# Supplementary material
Source: PubMed Central journal article supplement (PMC7064297)
Supplement: 140_-_JACOBS_APPENDIX.pdf [file 140_-_JACOBS_APPENDIX.pdf]

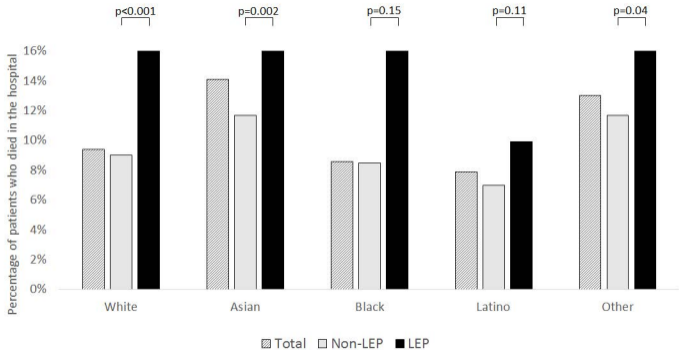

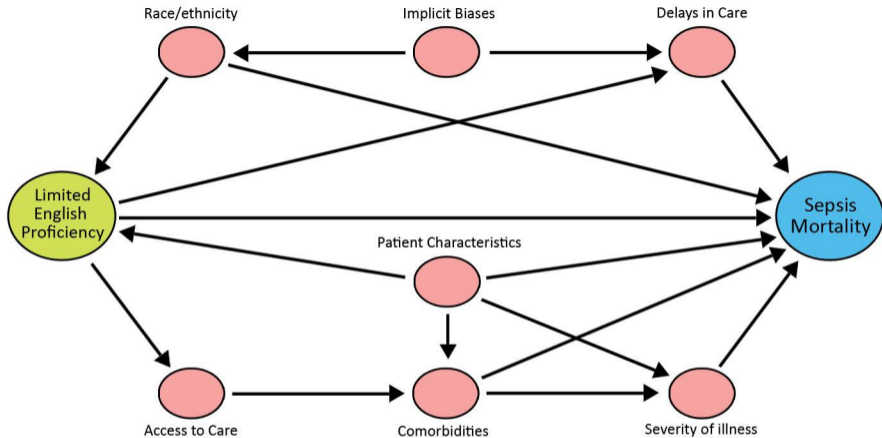

# LEGEND

## Access to care

- Insurance status
- Lack of transportation
- Disenfranchisement
- Continuity of care
- Preventive screening

## Comorbidities

- Chronic conditions
- VanWalraven score
- Functional status

## Characteristics

- Patient age
- Patient sex
- FHx/Genetics

## Severity of illness

- Type of infection
- SOFA score
- Septic shock
- Ventilation
- Multiorgan failure

## Delays in care

- Language barrier
- Diagnostic errors
- Sepsis bundle
- Time to antibiotics

Appendix Table 1: Most common primary languages stratified by race/ethnicity among 8,974 patients with sepsis.

| <b>Primary Language, N (%)</b> | <b><u>White</u></b><br>N = 4,001 | <b><u>Asian</u></b><br>N = 2,119 | <b><u>Black</u></b><br>N = 1,061 | <b><u>Latino</u></b><br>N = 1,029 | <b><u>Other</u></b><br>N = 764 |
|--------------------------------|----------------------------------|----------------------------------|----------------------------------|-----------------------------------|--------------------------------|
| English                        | 3,777 (94)                       | 917 (43)                         | 1,050 (99)                       | 653 (63)                          | 562 (73)                       |
| Cantonese                      | 1 (0.1)                          | 784 (37)                         | 0                                | 2 (0.2)                           | 53 (7)                         |
| Spanish                        | 6 (0.2)                          | 3 (0.1)                          | 1 (0.1)                          | 367 (36)                          | 15 (2)                         |
| Russian                        | 170 (4)                          | 1 (0.1)                          | 0                                | 0                                 | 37 (5)                         |
| Mandarin                       | 0                                | 152 (7)                          | 0                                | 0                                 | 7 (1)                          |
| Other                          | 47 (1)                           | 262 (12)                         | 10 (0.9)                         | 7 (0.7)                           | 90 (12)                        |

Appendix Table 2: Bivariate analyses of the association between inpatient mortality, limited English proficiency (LEP), and other covariates among 8,974 patients with sepsis

| <b>Covariate</b>                                  | <b><u>Died during hospitalization</u></b><br>N = 946 | <b><u>Alive at discharge</u></b><br>N = 8,028 | <b><u>Odds Ratio</u></b><br><b><u>(95% CI)</u></b> | <b><u>p-value</u></b> |
|---------------------------------------------------|------------------------------------------------------|-----------------------------------------------|----------------------------------------------------|-----------------------|
| <b>Age</b>                                        | --                                                   | --                                            | 1.02 (1.02-1.03)                                   | <0.001                |
| <b>Sex</b>                                        |                                                      |                                               |                                                    |                       |
| Male                                              | 502 (53)                                             | 4,260 (53)                                    | ref.                                               | ref.                  |
| Female                                            | 444 (47)                                             | 3,768 (47)                                    | 0.99 (0.87-1.14)                                   | 0.99                  |
| <b>Race</b>                                       |                                                      |                                               |                                                    |                       |
| White                                             | 377 (40)                                             | 3,624 (45)                                    | ref.                                               | ref.                  |
| Asian                                             | 298 (32)                                             | 1,821 (23)                                    | 1.57 (1.34-1.85)                                   | <0.001                |
| Black                                             | 91 (10)                                              | 970 (12)                                      | 0.90 (0.71-1.15)                                   | 0.40                  |
| Latino                                            | 81 (8)                                               | 948 (12)                                      | 0.82 (0.64-1.06)                                   | 0.12                  |
| Other                                             | 99 (10)                                              | 665 (8)                                       | 1.43 (1.13-1.81)                                   | 0.003                 |
| <b>Language</b>                                   |                                                      |                                               |                                                    |                       |
| Non-LEP                                           | 678 (72)                                             | 6,580 (82)                                    | ref.                                               | ref.                  |
| LEP                                               | 268 (28)                                             | 1,448 (18)                                    | 1.80 (1.54-2.09)                                   | <0.001                |
| <b>Insurance</b>                                  |                                                      |                                               |                                                    |                       |
| Commercial                                        | 127 (13)                                             | 1,537 (19)                                    | ref.                                               | ref.                  |
| Medicare                                          | 623 (66)                                             | 4,511 (56)                                    | 1.67 (1.37-2.04)                                   | <0.001                |
| Medicaid                                          | 190 (20)                                             | 1,926 (24)                                    | 1.19 (0.94-1.51)                                   | 0.14                  |
| Other                                             | 6 (0.6)                                              | 54 (0.7)                                      | 1.34 (0.57-3.19)                                   | 0.50                  |
| <b>Year</b>                                       |                                                      |                                               |                                                    |                       |
| 2012                                              | 101 (11)                                             | 746 (9)                                       | ref.                                               | ref.                  |
| 2013                                              | 194 (20)                                             | 1,570 (20)                                    | 0.91 (0.71-1.18)                                   | 0.48                  |
| 2014                                              | 196 (21)                                             | 1,799 (23)                                    | 0.81 (0.62-1.04)                                   | 0.10                  |
| 2015                                              | 245 (26)                                             | 1,955 (24)                                    | 0.93 (0.72-1.19)                                   | 0.54                  |
| 2016                                              | 210 (22)                                             | 1,958 (24)                                    | 0.79 (0.62-1.02)                                   | 0.07                  |
| <b>Admission level of care</b>                    |                                                      |                                               |                                                    |                       |
| Acute care                                        | 245 (26)                                             | 4,403 (55)                                    | ref.                                               | ref.                  |
| Transitional care unit                            | 230 (25)                                             | 2,267 (28)                                    | 1.82 (1.51-2.20)                                   | <0.001                |
| Intensive care unit                               | 461 (49)                                             | 1,320 (17)                                    | 6.28 (5.31-7.42)                                   | <0.001                |
| <b>van Walraven score</b>                         | --                                                   | --                                            | 1.09 (1.08-1.09)                                   | <0.001                |
| <b>Total SOFA score<sup>a,b</sup></b>             | --                                                   | --                                            | 1.39 (1.36-1.42)                                   | <0.001                |
| <b>Mechanical ventilation</b>                     | 381 (40)                                             | 758 (9)                                       | 6.50 (5.57-7.51)                                   | <0.001                |
| <b>Site of infection</b>                          |                                                      |                                               |                                                    |                       |
| Skin/Soft-tissue infection                        | 7 (0.7)                                              | 488 (6)                                       | ref.                                               | ref.                  |
| Other                                             | 26 (3)                                               | 519 (6)                                       | 3.49 (1.50-8.12)                                   | 0.004                 |
| Urinary tract infection                           | 30 (3)                                               | 540 (7)                                       | 3.87 (1.69-8.90)                                   | 0.001                 |
| None coded                                        | 257 (27)                                             | 2,161 (27)                                    | 8.29 (3.89-17.68)                                  | <0.001                |
| Pneumonia                                         | 127 (13)                                             | 1,013 (13)                                    | 8.74 (4.05-18.85)                                  | <0.001                |
| Multiple sites                                    | 341 (36)                                             | 2,361 (29)                                    | 10.07 (4.73-21.42)                                 | <0.001                |
| Bacteremia                                        | 158 (17)                                             | 946 (12)                                      | 11.64 (5.42-25.02)                                 | <0.001                |
| <b>Time to antibiotics in minutes<sup>c</sup></b> | --                                                   | --                                            | 0.82 (0.78-0.86)                                   | <0.001                |

<sup>a</sup> SOFA: Sequential [Sepsis-related] Organ Failure Assessment

<sup>b</sup> Total qualifying SOFA score achieved at the time patient first met sepsis definition SOFA criteria ( $\geq 2$ , within first 48 hours)

<sup>c</sup> Natural log transformed for best fit normal distribution
